# Supplementary material for: Chelation of [111In]In3+ with the dual-size-selective macrocycles py-macrodipa and py2-macrodipa
Source: Royal Society of Chemistry journal article supplement (doi:10.1039/d4dt02146k), 2024-01-01
Supplement: d4dt02146k2.pdf [file d4dt02146k2.pdf]

Electronic Supplementary Information (ESI) for  
**Chelation of [<sup>111</sup>In]In<sup>3+</sup> with the Dual-Size-Selective Macrocycles Py-macrodipa  
and Py<sub>2</sub>-macrodipa**

Kevin K. Lee,<sup>a,e†</sup> Mou Chakraborty,<sup>b,c</sup> Aohan Hu,<sup>a</sup> Thines Kanagasundaram,<sup>a</sup> Daniel L.J. Thorek<sup>b,c,d</sup> and Justin J. Wilson<sup>\*a,e†</sup>

\* Corresponding author, e-mail: justinjwilson@ucsb.edu

<sup>a</sup> Department of Chemistry and Chemical Biology, Cornell University, Ithaca, New York, 14853, USA

<sup>b</sup> Department of Radiology, Washington University School of Medicine, St. Louis, Missouri, 63110, USA

<sup>c</sup> Program in Quantitative Molecular Therapeutics, Washington University School of Medicine, St. Louis, Missouri, 63110, USA

<sup>d</sup> Department of Biomedical Engineering, Washington University, St. Louis, Missouri, 63110, USA

<sup>e</sup> Department of Chemistry & Biochemistry, University of California Santa Barbara, Santa Barbara, California, 93106, USA

| <b>Table of Contents</b>                                                                                                                                                                                                                                                  | <b>Page #</b> |
|---------------------------------------------------------------------------------------------------------------------------------------------------------------------------------------------------------------------------------------------------------------------------|---------------|
| <b>Figure S1.</b> <sup>1</sup> H NMR spectrum of <b>5</b>                                                                                                                                                                                                                 | S2            |
| <b>Figure S2.</b> <sup>13</sup> C{ <sup>1</sup> H} NMR spectrum of <b>5</b>                                                                                                                                                                                               | S3            |
| <b>Figure S3.</b> DART-MS of <b>5</b>                                                                                                                                                                                                                                     | S3            |
| <b>Figure S4.</b> <sup>1</sup> H NMR spectrum of <b>6</b>                                                                                                                                                                                                                 | S4            |
| <b>Figure S5.</b> <sup>13</sup> C{ <sup>1</sup> H} NMR spectrum of <b>6</b>                                                                                                                                                                                               | S5            |
| <b>Figure S6.</b> DART-MS of <b>6</b>                                                                                                                                                                                                                                     | S6            |
| <b>Figure S7.</b> <sup>1</sup> H NMR spectrum of <b>4</b>                                                                                                                                                                                                                 | S6            |
| <b>Figure S8.</b> DART-MS of <b>4</b>                                                                                                                                                                                                                                     | S7            |
| <b>Figure S9.</b> Spectrophotometric titration data fitting of In-py-macrodipa at 250 nm.                                                                                                                                                                                 | S7            |
| <b>Figure S10.</b> Spectrophotometric titration data fitting of In-py <sub>2</sub> -macrodipa at 260 nm.                                                                                                                                                                  | S8            |
| <b>Figure S11.</b> Radio-TLC of [ <sup>111</sup> In][In(py-macrodipa)] <sup>+</sup> and [ <sup>111</sup> In]InCl <sub>3</sub>                                                                                                                                             | S9            |
| <b>Figure S12.</b> Radio-TLC of [ <sup>111</sup> In][In(py <sub>2</sub> -macrodipa)] <sup>+</sup> and [ <sup>111</sup> In]InCl <sub>3</sub>                                                                                                                               | S9            |
| <b>Figure S13.</b> Radio-TLC of 1 mM macropa with [ <sup>111</sup> In]InCl <sub>3</sub>                                                                                                                                                                                   | S10           |
| <b>Figure S14.</b> Radio-TLC of 4 mM macropa with [ <sup>111</sup> In]InCl <sub>3</sub>                                                                                                                                                                                   | S10           |
| <b>Table S1.</b> Radiochemical conversions for the formation of [ <sup>111</sup> In][In(py-macrodipa)] <sup>+</sup> and [ <sup>111</sup> In][In(py <sub>2</sub> -macrodipa)] <sup>+</sup> at different ligand concentrations                                              | S11           |
| <b>Table S2.</b> Stability of [ <sup>111</sup> In][In(py-macrodipa)] <sup>+</sup> and [ <sup>111</sup> In][In(py <sub>2</sub> -marodipa)] <sup>+</sup> in human serum at 37 °C                                                                                            | S11           |
| <b>Figure S15</b> Radio-HPLC of [ <sup>111</sup> In][In(py-macrodipa)] <sup>+</sup> in human serum at 37 °C                                                                                                                                                               | S12           |
| <b>Figure S16.</b> Radio-HPLC of [ <sup>111</sup> In][In(py <sub>2</sub> -macrodipa)] <sup>+</sup> in human serum at 37 °C                                                                                                                                                | S13           |
| <b>Figure S17.</b> Human serum stability of [ <sup>111</sup> In][In(macropa)] <sup>+</sup> in human serum at 37 °C                                                                                                                                                        | S14           |
| <b>Table S3.</b> In vivo biodistribution of [ <sup>111</sup> In]InCl <sub>3</sub> , [ <sup>111</sup> In][In(macropa)] <sup>+</sup> , [ <sup>111</sup> In][In(py-macrodipa)] <sup>+</sup> , and [ <sup>111</sup> In][In(py <sub>2</sub> -macrodipa)] <sup>+</sup> in mice. | S14           |
| <b>DFT Calculations Supplementary Data</b>                                                                                                                                                                                                                                | S17           |

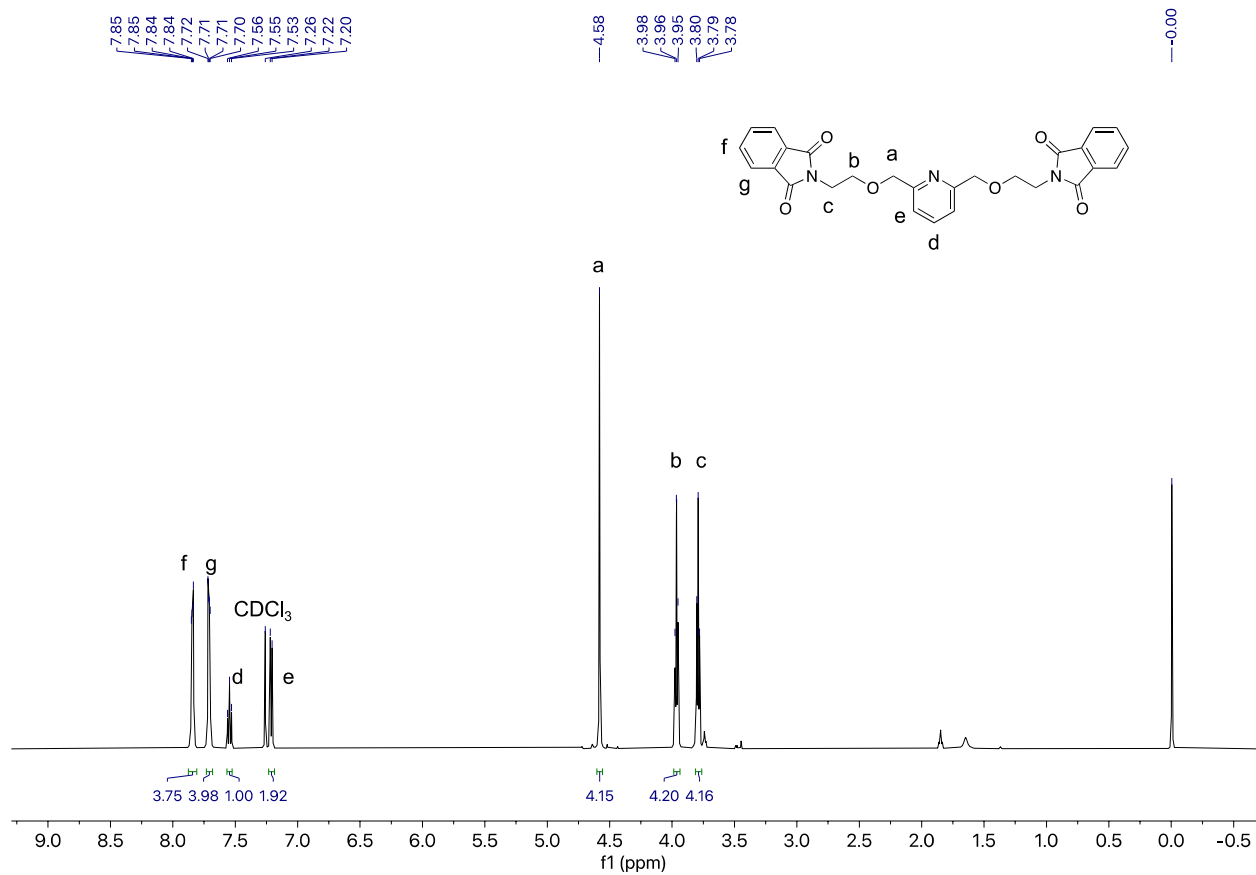

**Figure S1.**  $^1\text{H}$  NMR (500 MHz,  $\text{CDCl}_3$ , 25  $^\circ\text{C}$ ) spectrum of **5**.

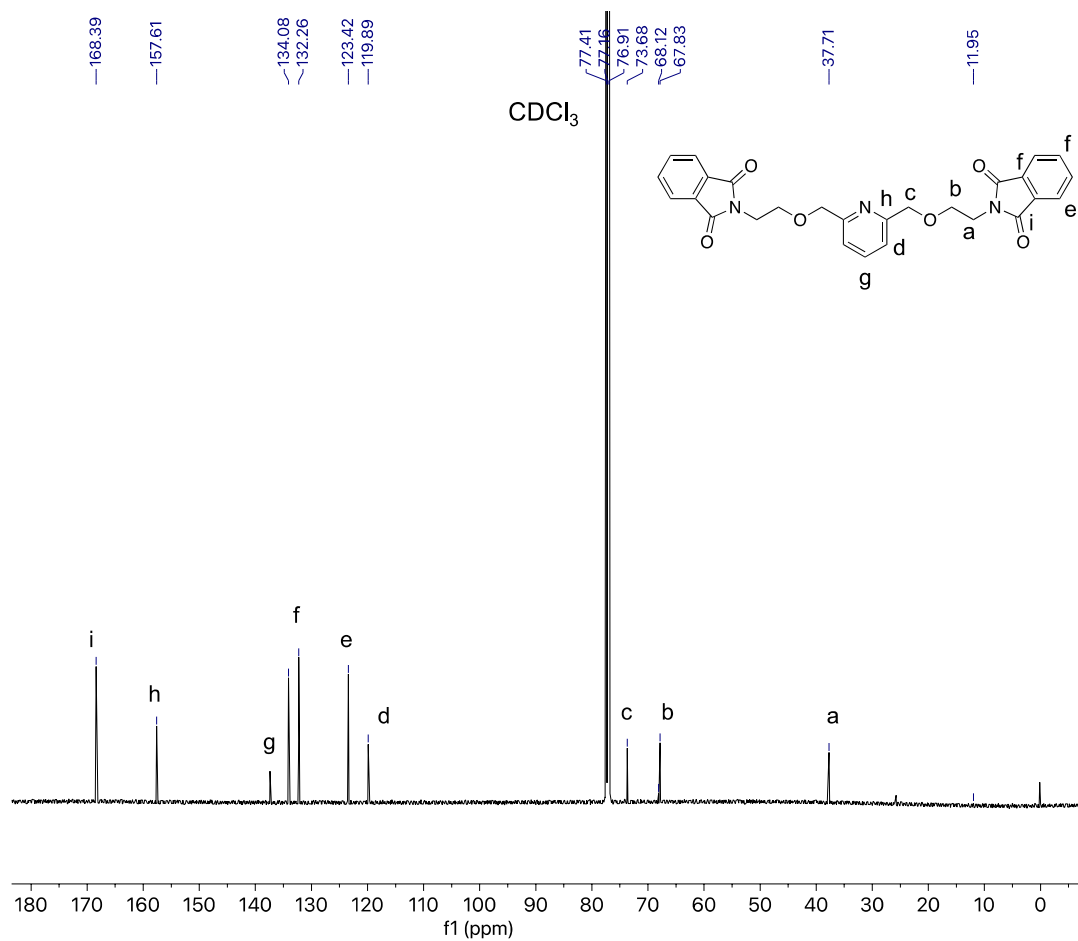

**Figure S2.**  $^{13}\text{C}\{^1\text{H}\}$  NMR (126 MHz,  $\text{CDCl}_3$ , 25 °C) spectrum of **5**.

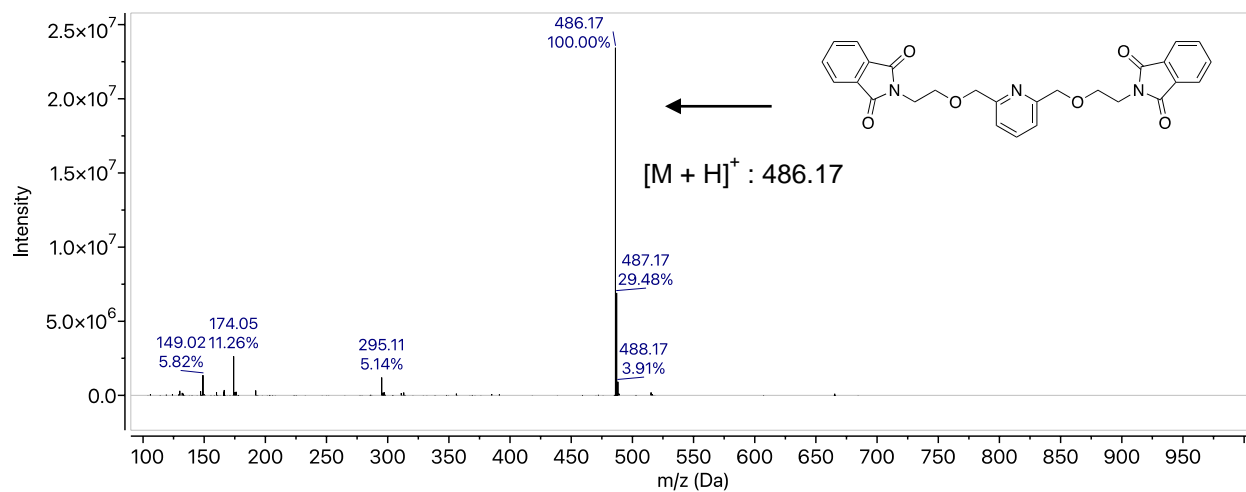

**Figure S3.** DART-MS of **5**. Chloroform was used as the solvent.

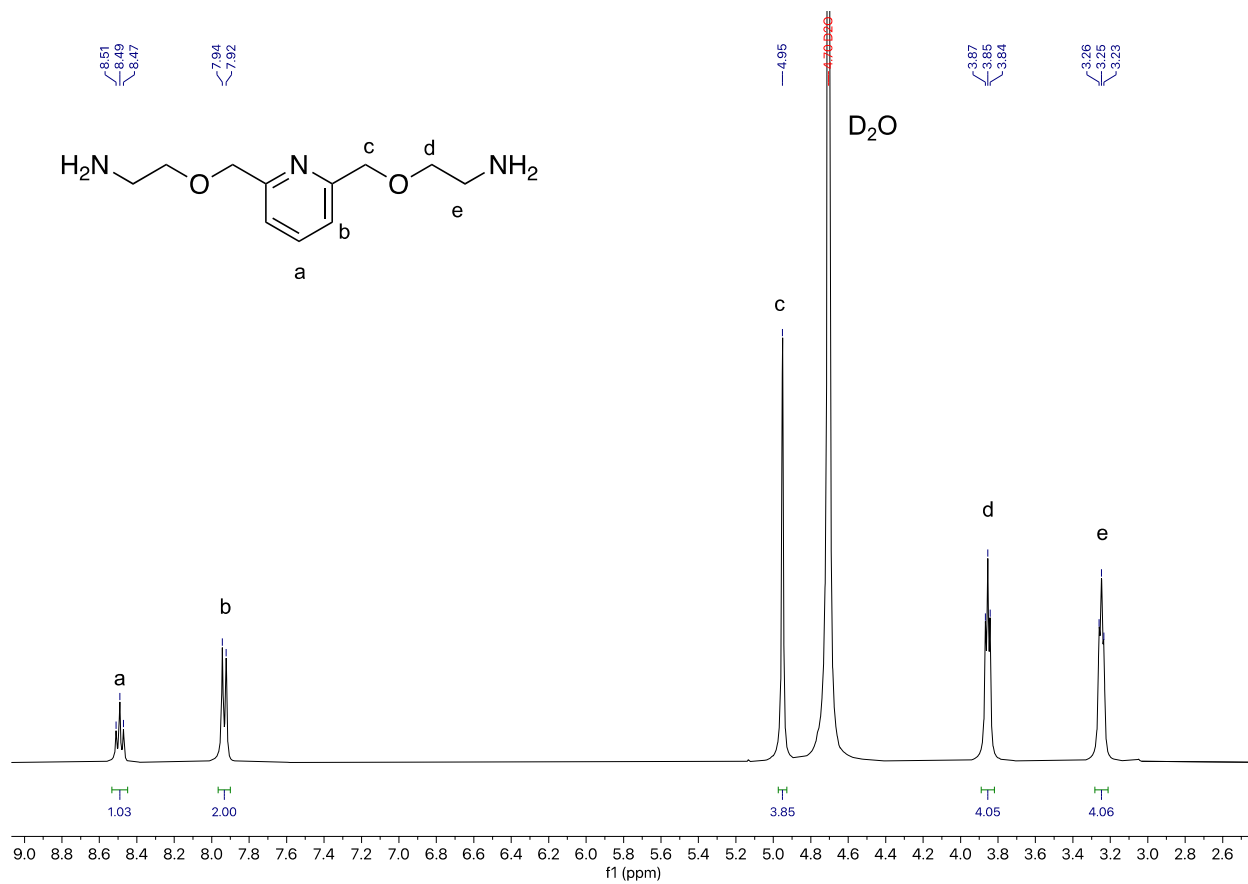

**Figure S4.** <sup>1</sup>H NMR (500 MHz, D<sub>2</sub>O, 25 °C) spectrum of **6**.

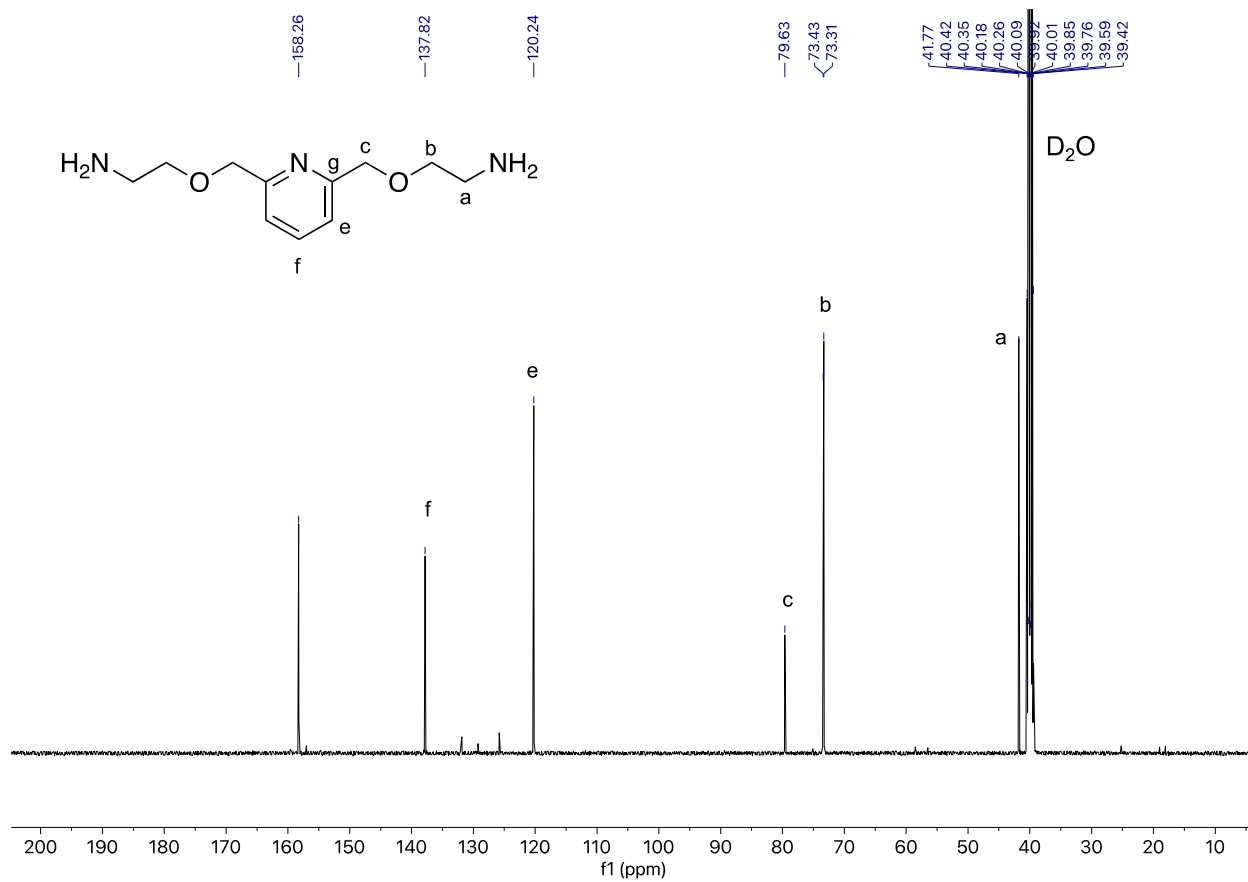

**Figure S5.**  $^{13}\text{C}\{^1\text{H}\}$  NMR (126 MHz,  $\text{DMSO-}d_6$ , 25 °C) spectrum of **6**.

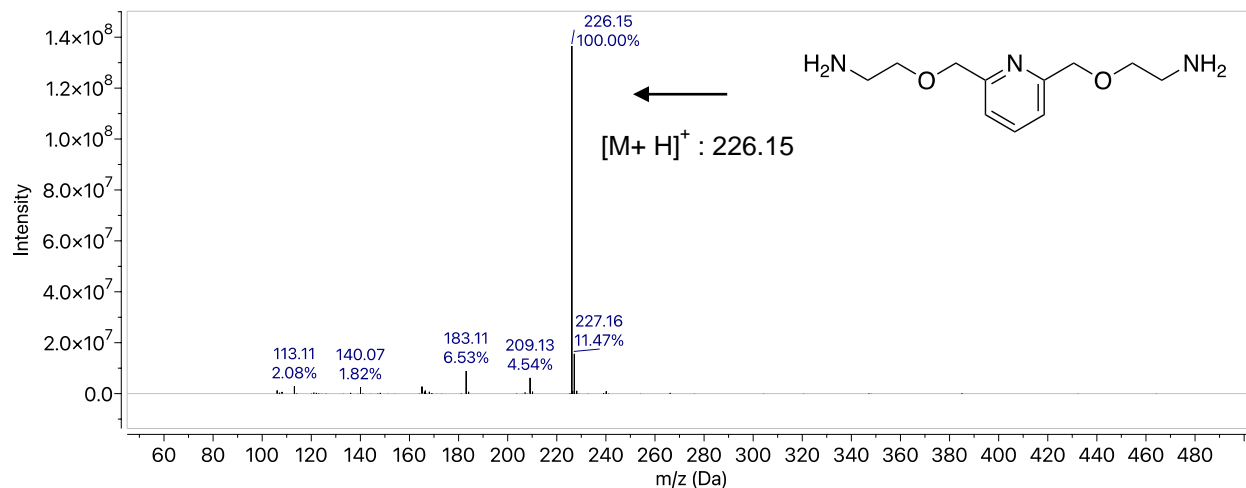

**Figure S6.** DART-MS of **6**. Water was used as the solvent.

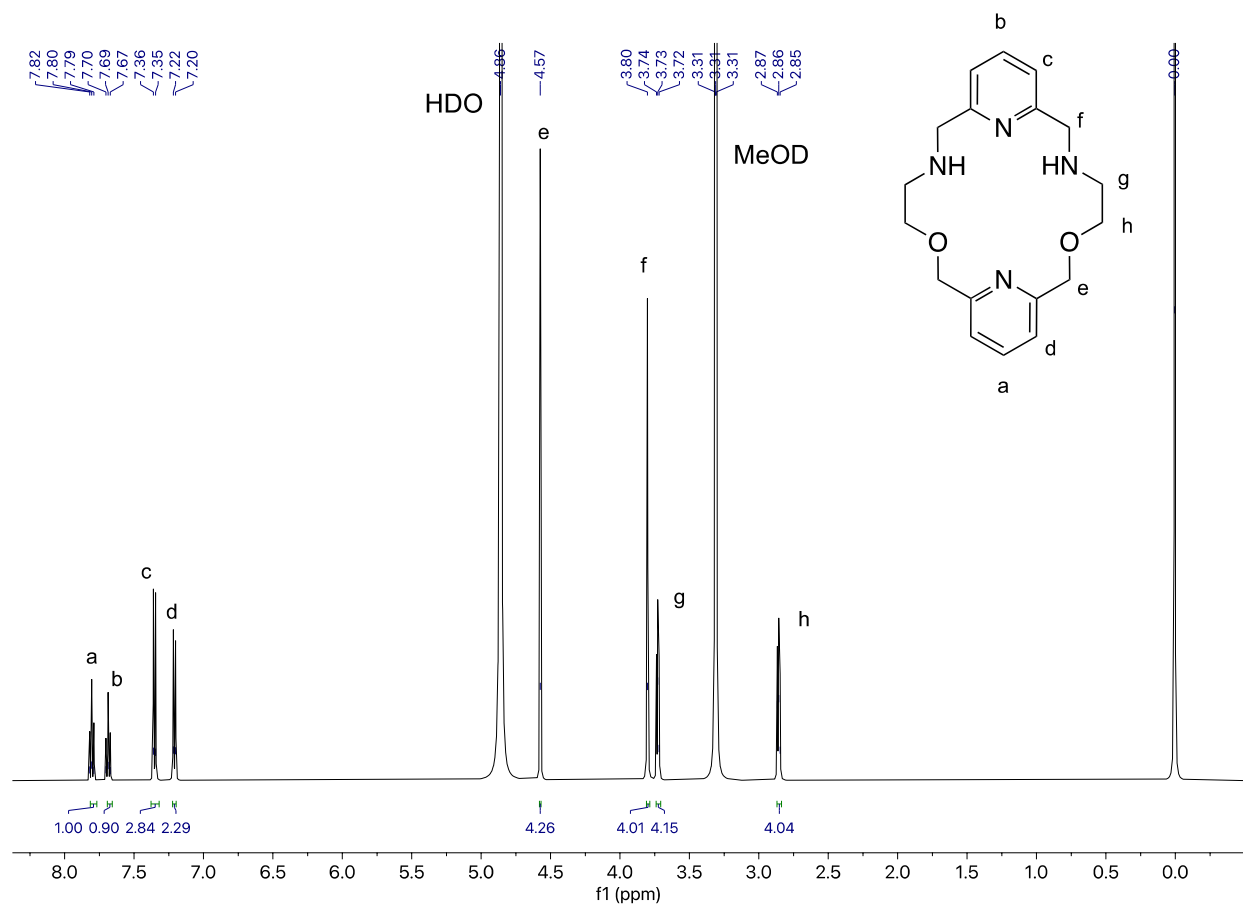

**Figure S7.**  $^1\text{H}$  NMR (500 MHz,  $\text{CD}_3\text{OD}$ , 25 °C) spectrum of **4**.

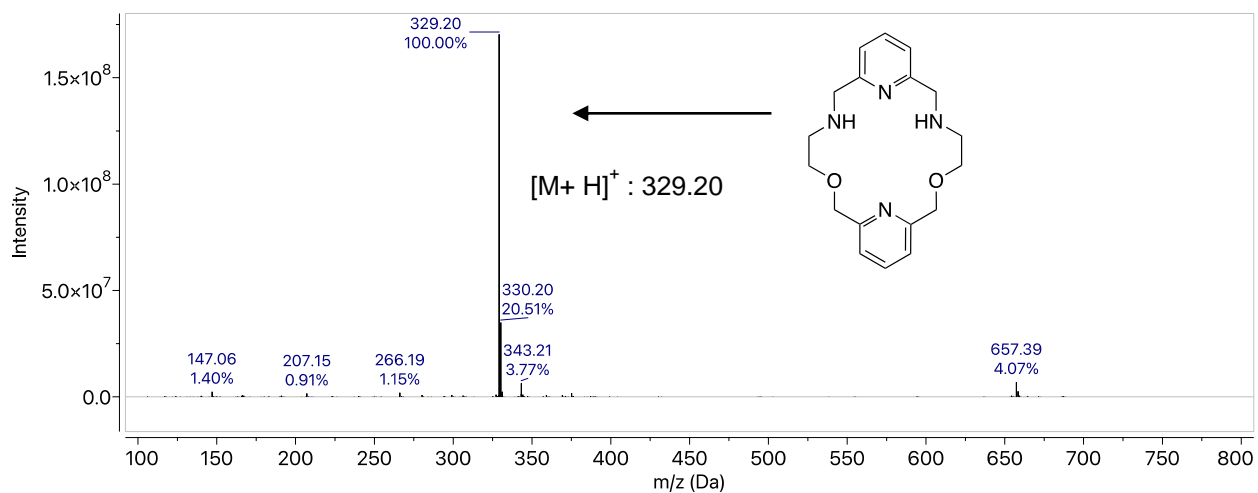

**Figure S8.** DART-MS of **4**. Methanol was used as the solvent.

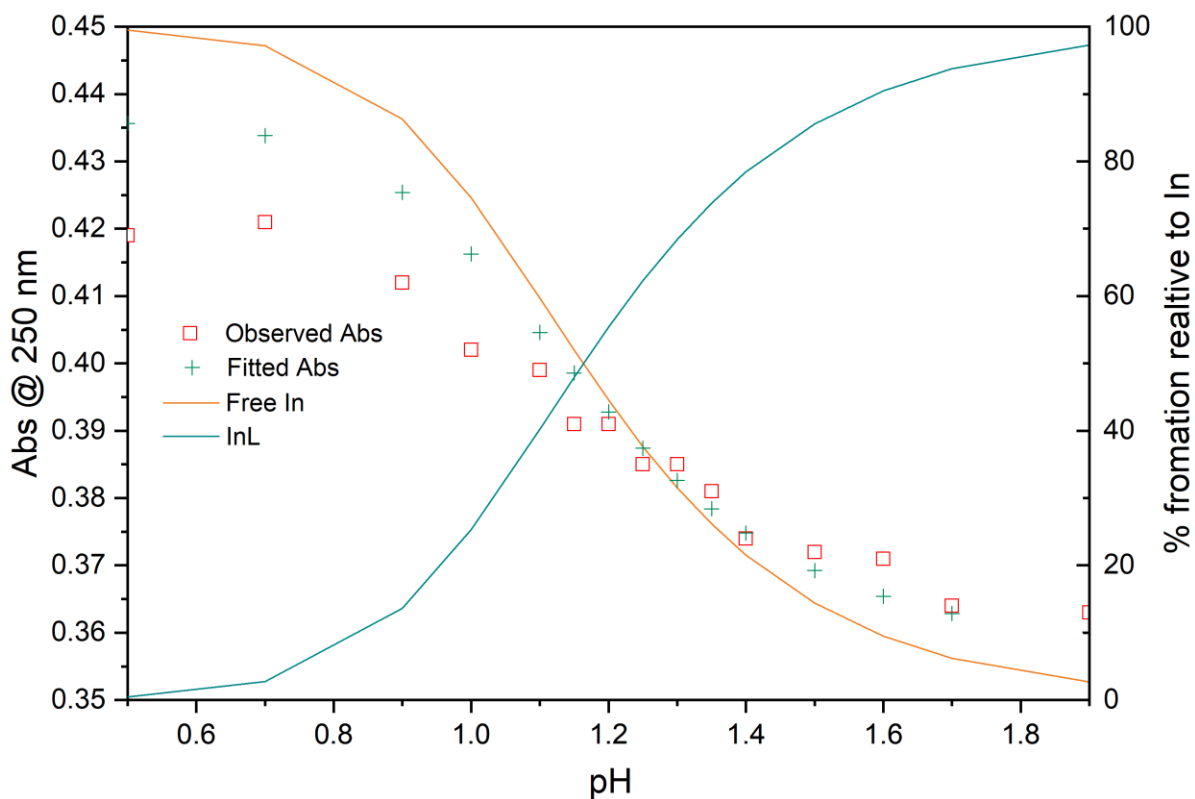

**Figure S9.** Representative UV–Vis spectrophotometric titration of  $\text{In}^{3+}$ -py-macrodipa system.  $c_{\text{In}} = c_{\text{py-macrodipa}} = 8 \times 10^{-5} \text{ M}$ . Data fitting at 250 nm (where the most significant spectral change occurs) and speciation distribution over the titration pH range (0.1 M KCl, 25 °C).

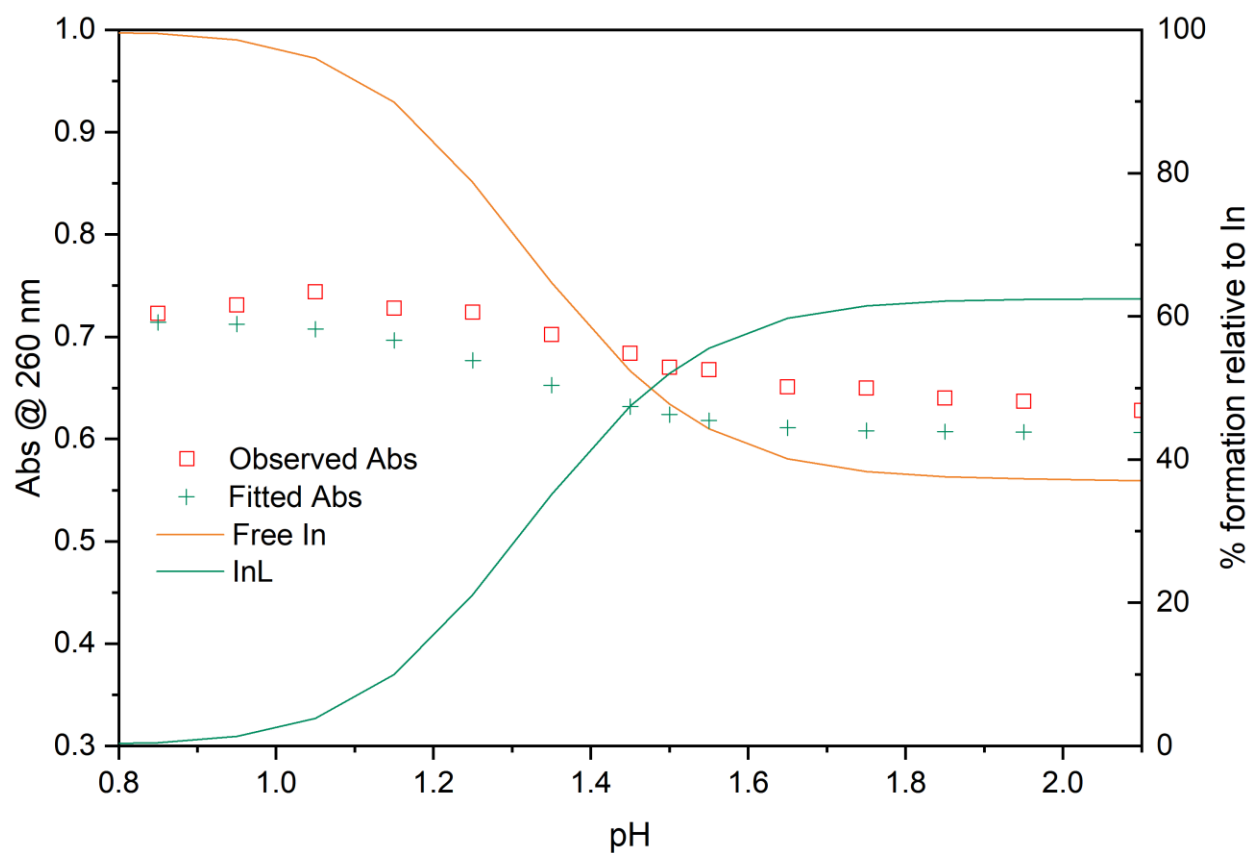

**Figure S10.** Representative UV–Vis spectrophotometric titration of  $\text{In}^{3+}$ -py-macrodipa system.  $c_{\text{In}} = c_{\text{py2-macrodipa}} = 5 \times 10^{-5}$  M. Data fitting at 260 nm (where the most significant spectral change occurs) and speciation distribution over the titration pH range (0.1 M KCl, 25 °C).



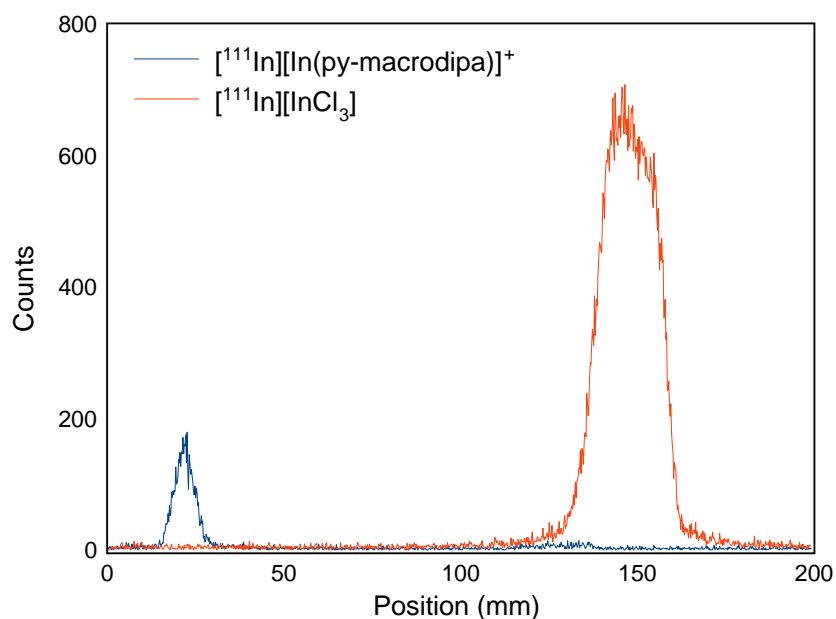

**Figure S11.** Representative radio-TLC of  $[^{111}\text{In}][\text{In}(\text{py-macrodipa})]^+$  compared to radio-TLC of  $[^{111}\text{In}][\text{InCl}_3]$ . Radiolabeling was performed with 100  $\mu\text{M}$  of py-macrodipa at 25  $^\circ\text{C}$  for 5 min, iTLC-SG eluted with 50 mM EDTA (pH 5.5).

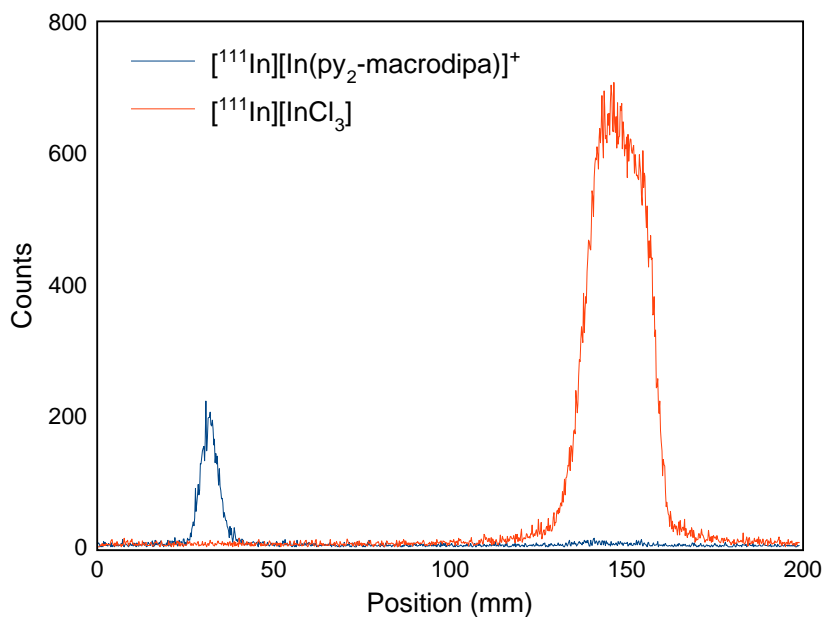

**Figure S12.** Representative radio-TLC of  $[^{111}\text{In}][\text{In}(\text{py}_2\text{-macrodipa})]^+$  compared to radio-TLC of  $[^{111}\text{In}][\text{InCl}_3]$ . Radiolabeling was performed with 100  $\mu\text{M}$  of  $\text{py}_2$ -macrodipa at 25  $^\circ\text{C}$  for 5 min, iTLC-SG eluted with 50 mM EDTA (pH 5.5).

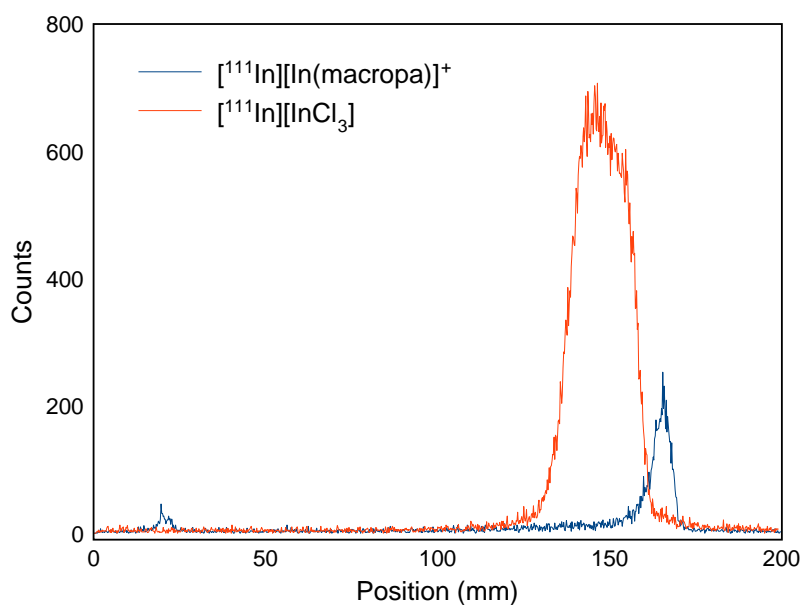

**Figure S13.** Representative radio-TLC of  $[^{111}\text{In}][\text{In}(\text{macropa})]^+$  compared to radio-TLC of  $[^{111}\text{In}][\text{InCl}_3]$ . Radiolabeling was performed with 1 mM of macropa at 25 °C for 5 min, iTLC-SG eluted with 50 mM EDTA (pH 5.5).

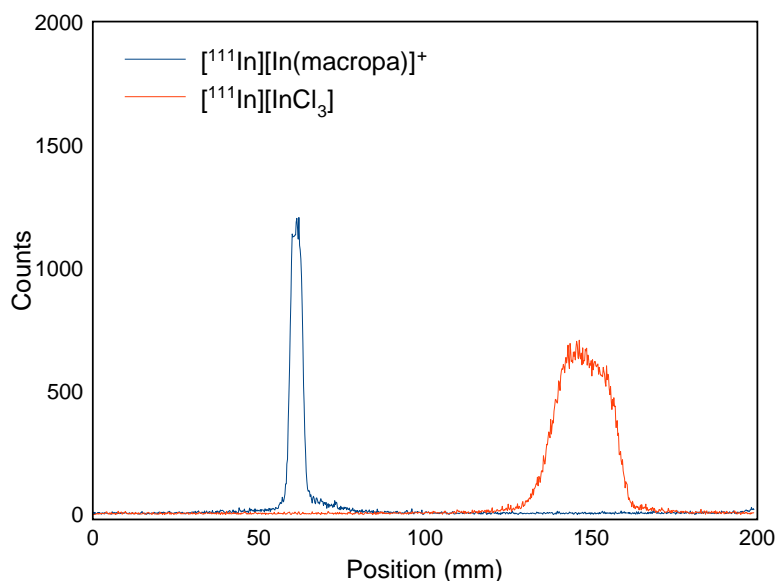

**Figure S14.** Representative radio-TLC of  $[^{111}\text{In}][\text{In}(\text{macropa})]^+$  compared to radio-TLC of  $[^{111}\text{In}][\text{InCl}_3]$ . Radiolabeling was performed with 4 mM of macropa at 25 °C for 60 min, iTLC-SG eluted with 50 mM EDTA (pH 5.5).

**Table S1.** Radiochemical Conversions of [ $^{111}\text{In}$ ] $\text{In}^{3+}$  with Py-macrodiapa and Py<sub>2</sub>-macrodiapa at Different Ligand Concentrations. (pH 5.5 ammonium acetate buffer; 25 °C; 5 min)<sup>a</sup>

| Ligand Concentration (M) | RCC (%)       |                             |
|--------------------------|---------------|-----------------------------|
|                          | Py-macrodiapa | Py <sub>2</sub> -macrodiapa |
| 1.0×10 <sup>-3</sup>     | 94.5 ± 1.8    | 94.6 ± 2.6                  |
| 1.0×10 <sup>-4</sup>     | 94.4 ± 2.5    | 95.4 ± 1.7                  |
| 1.0×10 <sup>-5</sup>     | 94.4 ± 2.2    | 95.5 ± 2.0                  |
| 1.0×10 <sup>-6</sup>     | 93.9 ± 2.1    | 92.9 ± 2.4                  |
| 1.0×10 <sup>-7</sup>     | 15.2 ± 1.4    | 25.3 ± 3.8                  |
| 1.0×10 <sup>-8</sup>     | 11.6 ± 0.3    | 19.0 ± 0.7                  |

<sup>a</sup> Measurements were carried out in triplicate and the error is the standard deviation of these replicates.

**Table S2.** Stability of [ $^{111}\text{In}$ ][ $\text{In}(\text{py-macrodiapa})^+$ ] and [ $^{111}\text{In}$ ][ $\text{In}(\text{py}_2\text{-macrodiapa})^+$ ] in Human Serum at 37 °C<sup>a</sup>

| Time (h) | % Complex Intact |                             |
|----------|------------------|-----------------------------|
|          | Py-macrodiapa    | Py <sub>2</sub> -macrodiapa |
| 1        | 98.6 ± 0.2       | 99.1 ± 0.1                  |
| 18       | 96.7 ± 2.1       | 97.3 ± 0.6                  |
| 30       | 94.6 ± 3.5       | 98.2 ± 1.0                  |
| 42       | 96.8 ± 4.6       | 98.6 ± 0.5                  |
| 54       | 95.9 ± 3.4       | 97.7 ± 1.4                  |
| 66       | 91.0 ± 7.8       | 97.1 ± 0.3                  |
| 78       | 95.4 ± 5.9       | 97.1 ± 1.9                  |
| 90       | 92.0 ± 6.4       | 92.9 ± 2.2                  |
| 102      | 95.8 ± 1.2       | 95.4 ± 3.6                  |
| 114      | 96.8 ± 1.0       | 98.6 ± 1.2                  |
| 126      | 97.3 ± 3.5       | 94.2 ± 3.3                  |
| 138      | 94.8 ± 4.1       | 98.4 ± 1.8                  |

<sup>a</sup> Measurements were carried out in triplicate and the error is the standard deviation of these replicates.

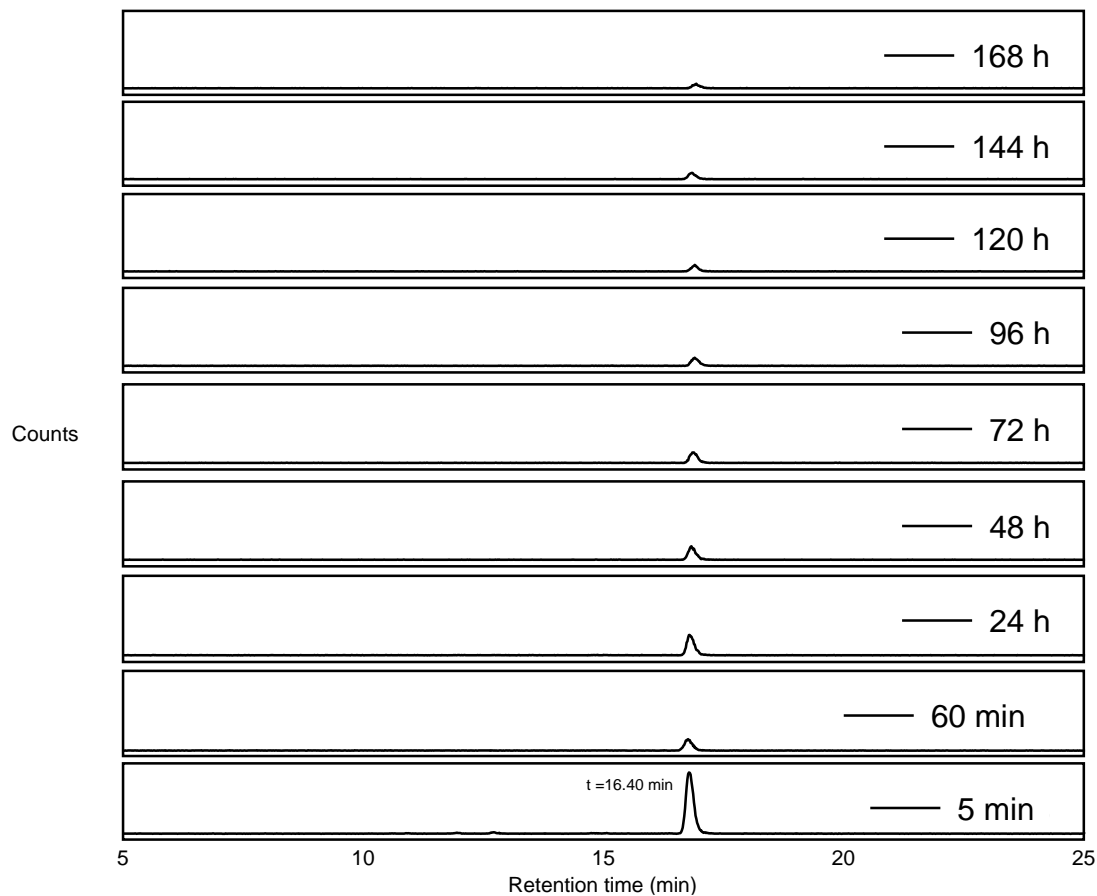

**Figure S15.** Representative radio-HPLC of  $[^{111}\text{In}][\text{In}(\text{py-macrodiapa})]^+$  in human serum at 37 °C at each time point. The  $[^{111}\text{In}][\text{In}(\text{py-macrodiapa})]^+$  complex was eluted with 0 to 90% B linear gradient 20 min (A:  $\text{H}_2\text{O} + 0.1\%$  TFA, B: MeOH).

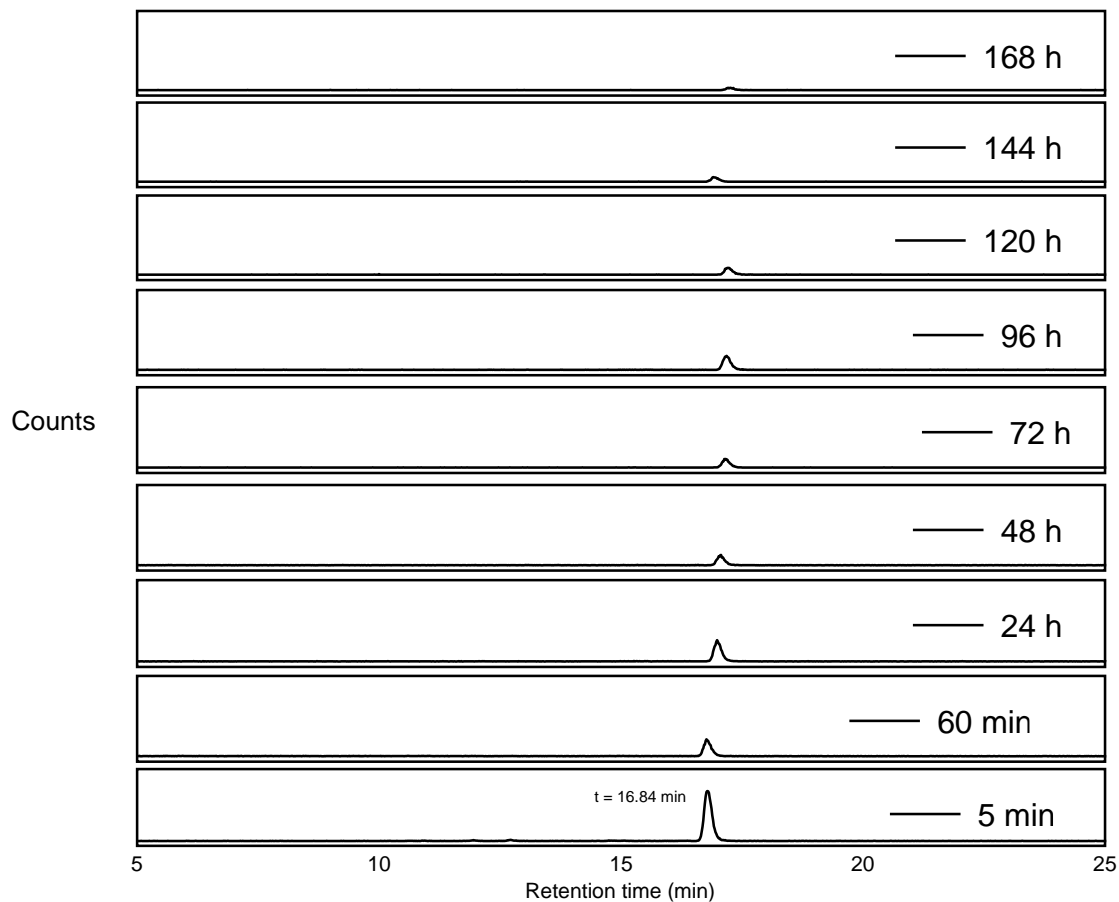

**Figure S16.** Representative radio-HPLC of  $[^{111}\text{In}][\text{In}(\text{py}_2\text{-macrodira})]^+$  in human serum at 37 °C at each time point. The  $[^{111}\text{In}][\text{In}(\text{py}_2\text{-macrodira})]^+$  complex was eluted with 0 to 90% B linear gradient 20 min (A:  $\text{H}_2\text{O}$  + 0.1% TFA, B: MeOH).

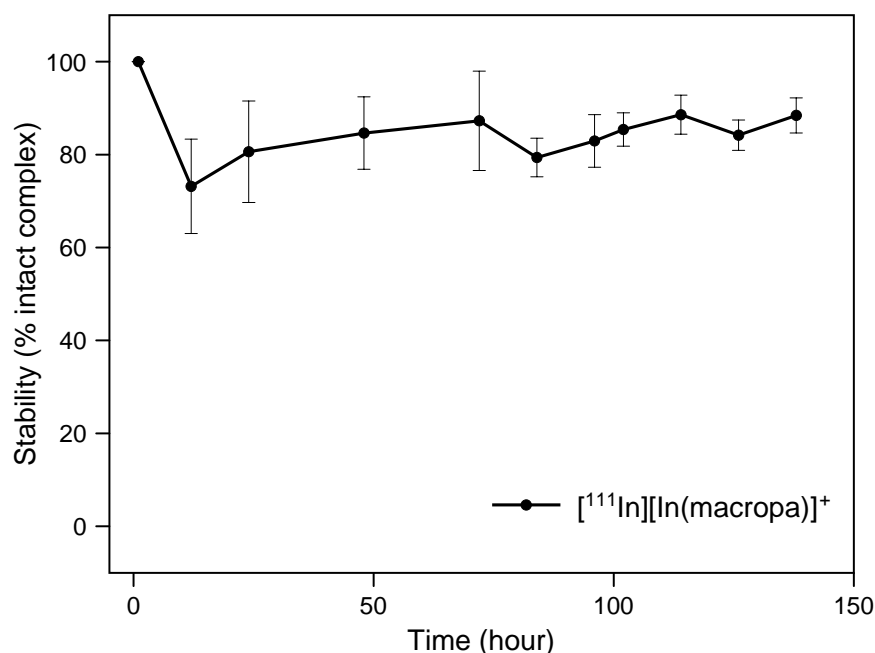

**Figure S17.** Human serum stability of  $[^{111}\text{In}][\text{In}(\text{macropa})]^+$ , prepared from a 4 mM solution of macropa, in human serum at 37 °C.

**Table S3.** In Vivo biodistribution of  $[^{111}\text{In}]\text{InCl}_3$ ,  $[^{111}\text{In}][\text{In}(\text{macropa})]^+$ ,  $[^{111}\text{In}][\text{In}(\text{py-macrodipa})]^+$ , and  $[^{111}\text{In}][\text{In}(\text{py}_2\text{-macrodipa})]^+$ . Values for each time point are given as percent injected activity per gram (% IA/g).

| $[^{111}\text{In}]\text{InCl}_3$ |          |          |   |          |          |   |          |          |   |
|----------------------------------|----------|----------|---|----------|----------|---|----------|----------|---|
| Organ                            | 0.5h     | SD       | N | 2h       | SD       | N | 24h      | SD       | N |
| Blood                            | 11.13107 | 2.387162 | 3 | 10.99167 | 2.248077 | 4 | 1.539148 | 0.382377 | 4 |
| Heart                            | 3.560892 | 1.424547 | 4 | 4.265713 | 1.552329 | 4 | 1.605656 | 0.283035 | 4 |
| Lungs                            | 7.568539 | 2.37174  | 4 | 8.971456 | 1.380778 | 4 | 2.172134 | 0.467755 | 4 |
| Liver                            | 3.948502 | 1.321652 | 4 | 5.339713 | 0.931532 | 4 | 6.374404 | 1.075833 | 4 |
| Kidneys                          | 26.30511 | 7.142211 | 4 | 22.21027 | 1.907116 | 4 | 18.81397 | 3.571606 | 4 |
| Spleen                           | 1.501223 | 0.384365 | 4 | 2.151759 | 0.34837  | 4 | 2.475891 | 0.523328 | 4 |
| Stomach                          | 1.457286 | 0.239089 | 4 | 1.551429 | 0.304916 | 4 | 1.486169 | 0.432787 | 4 |
| SI                               | 1.915439 | 0.537025 | 4 | 2.525415 | 0.24857  | 4 | 3.526138 | 1.28484  | 4 |
| LI                               | 1.62573  | 0.337636 | 4 | 1.731226 | 0.093102 | 4 | 2.888496 | 0.95843  | 4 |
| Skin                             | 1.929875 | 0.286741 | 4 | 3.03683  | 0.7356   | 4 | 3.316639 | 1.747006 | 4 |
| Muscle                           | 1.269709 | 0.175996 | 4 | 1.555392 | 0.328284 | 4 | 1.090269 | 0.130789 | 4 |
| Fat                              | 0.645009 | 0.067731 | 4 | 0.73238  | 0.150988 | 4 | 1.448041 | 0.240477 | 4 |
| Tibia                            | 3.730426 | 0.805453 | 4 | 4.426114 | 0.983589 | 4 | 5.544644 | 1.344146 | 4 |

|                                                                     |          |          |   |          |          |   |          |          |   |
|---------------------------------------------------------------------|----------|----------|---|----------|----------|---|----------|----------|---|
| Calvaria                                                            | 6.207776 | 2.774584 | 4 | 5.743241 | 2.183205 | 4 | 4.829896 | 1.645127 | 4 |
| Brain                                                               | 0.388945 | 0.107009 | 4 | 0.453189 | 0.136824 | 4 | 0.329639 | 0.143389 | 4 |
|                                                                     |          |          |   |          |          |   |          |          |   |
| <b>[<sup>111</sup>In][In(macropa)]<sup>+</sup></b>                  |          |          |   |          |          |   |          |          |   |
| Organ                                                               | 0.5h     | SD       | N | 2h       | SD       | N | 24h      | SD       | N |
| Blood                                                               | 4.782224 | 2.914834 | 4 | 4.094154 | 0.904548 | 4 | 0.878577 | 0.268915 | 4 |
| Heart                                                               | 1.558579 | 0.829127 | 4 | 1.421515 | 0.630122 | 4 | 0.9374   | 0.253781 | 4 |
| Lungs                                                               | 2.763457 | 1.134809 | 4 | 2.990757 | 0.341958 | 4 | 1.431556 | 0.385342 | 4 |
| Liver                                                               | 15.19309 | 5.041646 | 4 | 12.91125 | 2.031918 | 4 | 14.57441 | 1.334882 | 4 |
| Kidneys                                                             | 20.17845 | 8.143421 | 4 | 16.838   | 1.912519 | 4 | 12.78058 | 1.49039  | 4 |
| Spleen                                                              | 3.078484 | 1.032171 | 4 | 2.943872 | 1.025778 | 4 | 4.88973  | 0.924699 | 4 |
| Stomach                                                             | 1.048924 | 0.684695 | 4 | 0.752056 | 0.214279 | 4 | 0.599637 | 0.114436 | 4 |
| SI                                                                  | 1.302555 | 0.523919 | 4 | 1.055602 | 0.269007 | 4 | 1.777868 | 0.612654 | 4 |
| LI                                                                  | 0.787561 | 0.278362 | 4 | 0.564742 | 0.126833 | 4 | 1.395949 | 0.183911 | 4 |
| Skin                                                                | 2.422796 | 1.36334  | 4 | 1.604344 | 0.252224 | 4 | 1.397086 | 0.674619 | 4 |
| Muscle                                                              | 0.855188 | 0.453229 | 4 | 0.786775 | 0.111746 | 4 | 0.613638 | 0.275787 | 4 |
| Fat                                                                 | 0.316589 | 0.163447 | 4 | 0.343115 | 0.103872 | 4 | 0.373918 | 0.174359 | 4 |
| Tibia                                                               | 2.559857 | 1.258309 | 4 | 2.109007 | 0.549312 | 4 | 5.020104 | 2.332986 | 4 |
| Calvaria                                                            | 1.95803  | 0.768036 | 4 | 5.811043 | 5.047601 | 4 | 3.248906 | 1.590549 | 4 |
| Brain                                                               | 0.193591 | 0.102604 | 4 | 0.328824 | 0.232935 | 4 | 0.29827  | 0.192681 | 4 |
|                                                                     |          |          |   |          |          |   |          |          |   |
| <b>[<sup>111</sup>In][In(py-macrodipa)]<sup>+</sup></b>             |          |          |   |          |          |   |          |          |   |
| Organ                                                               | 0.5h     | SD       | N | 2h       | SD       | N | 24h      | SD       | N |
| Blood                                                               | 1.400774 | 0.723207 | 4 | 0.594822 | 0.106937 | 4 | 0.114847 | 0.008651 | 4 |
| Heart                                                               | 0.355246 | 0.071371 | 4 | 0.252819 | 0.027638 | 4 | 0.109244 | 0.016135 | 4 |
| Lungs                                                               | 0.84843  | 0.135726 | 4 | 0.579747 | 0.118124 | 4 | 0.212841 | 0.032395 | 4 |
| Liver                                                               | 1.708602 | 0.408891 | 4 | 1.52174  | 0.269168 | 4 | 1.212741 | 0.081314 | 4 |
| Kidneys                                                             | 4.183916 | 0.858547 | 4 | 2.454069 | 0.426451 | 4 | 1.715354 | 0.406197 | 4 |
| Spleen                                                              | 0.230208 | 0.042861 | 4 | 0.209191 | 0.029657 | 4 | 0.228522 | 0.025462 | 4 |
| Stomach                                                             | 0.219969 | 0.114095 | 4 | 0.240923 | 0.074726 | 4 | 0.204004 | 0.09544  | 4 |
| SI                                                                  | 1.608592 | 0.48418  | 4 | 0.474462 | 0.157343 | 4 | 0.325727 | 0.050428 | 4 |
| LI                                                                  | 0.22966  | 0.022873 | 4 | 0.389954 | 0.084001 | 3 | 0.655123 | 0.216229 | 4 |
| Skin                                                                | 0.57443  | 0.310589 | 4 | 0.356216 | 0.148534 | 4 | 0.260106 | 0.085732 | 4 |
| Muscle                                                              | 0.209054 | 0.063685 | 4 | 0.153686 | 0.027049 | 4 | 0.089358 | 0.04378  | 4 |
| Fat                                                                 | 0.100041 | 0.045277 | 4 | 0.056719 | 0.016277 | 4 | 0.061684 | 0.038679 | 4 |
| Tibia                                                               | 0.342032 | 0.022672 | 4 | 0.236833 | 0.080962 | 4 | 0.326742 | 0.032326 | 4 |
| Calvaria                                                            | 0.88553  | 0.731249 | 4 | 0.258182 | 0.126479 | 4 | 0.194959 | 0.065245 | 4 |
| Brain                                                               | 0.065461 | 0.016188 | 4 | 0.038077 | 0.002702 | 4 | 0.022074 | 0.002256 | 4 |
|                                                                     |          |          |   |          |          |   |          |          |   |
| <b>[<sup>111</sup>In][In(py<sub>2</sub>-macrodipa)]<sup>+</sup></b> |          |          |   |          |          |   |          |          |   |
| Organ                                                               | 0.5h     | SD       | N | 2h       | SD       | N | 24h      | SD       | N |

|          |          |          |   |          |          |   |          |          |   |
|----------|----------|----------|---|----------|----------|---|----------|----------|---|
| Blood    | 1.2221   | 0.25207  | 4 | 0.738129 | 0.093919 | 4 | 0.112384 | 0.040665 | 4 |
| Heart    | 0.330945 | 0.033477 | 4 | 0.273234 | 0.016921 | 4 | 0.097447 | 0.040542 | 4 |
| Lungs    | 0.935808 | 0.138492 | 4 | 0.588315 | 0.047808 | 4 | 0.149852 | 0.061284 | 4 |
| Liver    | 2.287751 | 0.945966 | 4 | 1.215243 | 0.141374 | 4 | 1.372107 | 0.564503 | 4 |
| Kidneys  | 4.572923 | 0.832515 | 4 | 2.143948 | 0.39301  | 4 | 1.452306 | 0.398568 | 4 |
| Spleen   | 0.251381 | 0.05831  | 4 | 0.201484 | 0.014043 | 4 | 0.167861 | 0.051657 | 4 |
| Stomach  | 0.396485 | 0.338435 | 4 | 0.238631 | 0.062347 | 4 | 0.10076  | 0.054667 | 4 |
| SI       | 2.657816 | 1.07697  | 3 | 0.529708 | 0.060434 | 4 | 0.206904 | 0.098133 | 4 |
| LI       | 0.238404 | 0.025538 | 4 | 0.604338 | 0.341423 | 4 | 0.434948 | 0.162334 | 4 |
| Skin     | 0.986358 | 0.289192 | 4 | 0.349595 | 0.092482 | 4 | 0.254275 | 0.103598 | 4 |
| Muscle   | 0.233684 | 0.039382 | 4 | 0.120034 | 0.026868 | 4 | 0.087325 | 0.04271  | 4 |
| Fat      | 0.10147  | 0.038766 | 4 | 0.062716 | 0.023519 | 4 | 0.047849 | 0.024926 | 4 |
| Tibia    | 0.441128 | 0.112989 | 4 | 0.27799  | 0.028405 | 4 | 0.372908 | 0.156774 | 4 |
| Calvaria | 0.455986 | 0.310202 | 4 | 0.449871 | 0.160244 | 4 | 0.247592 | 0.094029 | 4 |
| Brain    | 0.23701  | 0.368349 | 4 | 0.129971 | 0.184326 | 4 | 0.01973  | 0.006846 | 4 |



## DFT Calculation Supplementary Data

We herein list all energy outputs of our computations in this work. Their corresponding geometry outputs (.xyz) are included in a compressed file (.zip) as an independent ESI file.

### (1) In-py-macrodipa complex, Conformation A

|                                              |                             |
|----------------------------------------------|-----------------------------|
| Zero-point correction=                       | 0.619717 (Hartree/Particle) |
| Thermal correction to Energy=                | 0.654514                    |
| Thermal correction to Enthalpy=              | 0.655458                    |
| Thermal correction to Gibbs Free Energy=     | 0.556568                    |
| Sum of electronic and zero-point Energies=   | -1925.979569                |
| Sum of electronic and thermal Energies=      | -1925.944771                |
| Sum of electronic and thermal Enthalpies=    | -1925.943827                |
| Sum of electronic and thermal Free Energies= | -1926.042718                |

SMD method:  
E( $\omega$ B97XD) = -1926.68381750

### (2) In-py-macrodipa complex, Conformation B without H<sub>2</sub>O

|                                              |                             |
|----------------------------------------------|-----------------------------|
| Zero-point correction=                       | 0.618445 (Hartree/Particle) |
| Thermal correction to Energy=                | 0.653934                    |
| Thermal correction to Enthalpy=              | 0.654878                    |
| Thermal correction to Gibbs Free Energy=     | 0.553760                    |
| Sum of electronic and zero-point Energies=   | -1925.965301                |
| Sum of electronic and thermal Energies=      | -1925.929812                |
| Sum of electronic and thermal Enthalpies=    | -1925.928867                |
| Sum of electronic and thermal Free Energies= | -1926.029985                |

SMD method:  
E( $\omega$ B97XD) = -1926.68750206

### (3) In-py-macrodipa complex, Conformation B with H<sub>2</sub>O

|                                              |                             |
|----------------------------------------------|-----------------------------|
| Zero-point correction=                       | 0.645745 (Hartree/Particle) |
| Thermal correction to Energy=                | 0.682813                    |
| Thermal correction to Enthalpy=              | 0.683758                    |
| Thermal correction to Gibbs Free Energy=     | 0.579899                    |
| Sum of electronic and zero-point Energies=   | -2002.406091                |
| Sum of electronic and thermal Energies=      | -2002.369023                |
| Sum of electronic and thermal Enthalpies=    | -2002.368079                |
| Sum of electronic and thermal Free Energies= | -2002.471937                |

SMD method:  
E( $\omega$ B97XD) = -2003.14303801

### (4) In-py<sub>2</sub>-macrodipa complex, Conformation A

|                        |                             |
|------------------------|-----------------------------|
| Zero-point correction= | 0.625731 (Hartree/Particle) |
|------------------------|-----------------------------|

Thermal correction to Energy= 0.662191  
Thermal correction to Enthalpy= 0.663135  
Thermal correction to Gibbs Free Energy= 0.558961  
Sum of electronic and zero-point Energies= -2019.190013  
Sum of electronic and thermal Energies= -2019.153552  
Sum of electronic and thermal Enthalpies= -2019.152608  
Sum of electronic and thermal Free Energies= -2019.256782

SMD method:  
E( $\omega$ B97XD) = -2019.90344501

#### (4) In-py<sub>2</sub>-macrodiapa complex, Conformation B with H<sub>2</sub>O

Zero-point correction= 0.653076 (Hartree/Particle)  
Thermal correction to Energy= 0.690976  
Thermal correction to Enthalpy= 0.691921  
Thermal correction to Gibbs Free Energy= 0.586259  
Sum of electronic and zero-point Energies= -2095.625773  
Sum of electronic and thermal Energies= -2095.587873  
Sum of electronic and thermal Enthalpies= -2095.586929  
Sum of electronic and thermal Free Energies= -2095.692590

SMD method:  
E( $\omega$ B97XD) = -2096.37041781

#### (5) In-py<sub>2</sub>-macrodiapa complex, Conformation B without H<sub>2</sub>O

Zero-point correction= 0.624846 (Hartree/Particle)  
Thermal correction to Energy= 0.661379  
Thermal correction to Enthalpy= 0.662324  
Thermal correction to Gibbs Free Energy= 0.558857  
Sum of electronic and zero-point Energies= -2019.182320  
Sum of electronic and thermal Energies= -2019.145787  
Sum of electronic and thermal Enthalpies= -2019.144842  
Sum of electronic and thermal Free Energies= -2019.248309

SMD method:  
E( $\omega$ B97XD) = -2019.9111516
